# Supplementary material for: Changes in launch delay and availability of pharmaceuticals in 30 European markets over the past two decades
Source: Springer Nature journal article supplement (doi:10.1186/s12913-022-08866-7), 2022-11-30
Supplement: MOESM1 [file 23772962]

Table S1: Correlation analysis

|                      | correlation coeff. | p-value |
|----------------------|--------------------|---------|
| Launch delay and GDP | -0.67              | <0.000  |
| Availability and GDP | 0.19               | <0.000  |
