# Supplementary material for: Changes in launch delay and availability of pharmaceuticals in 30 European markets over the past two decades
Source: Springer Nature journal article supplement (doi:10.1186/s12913-022-08866-7), 2022-11-30
Supplement: MOESM2 [file 23772962]

Table S2: Launch delay for all pharmaceuticals vs. EMLs

| Country        | Launch delay  |               |               |               |               |               |               |                                                                   |
|----------------|---------------|---------------|---------------|---------------|---------------|---------------|---------------|-------------------------------------------------------------------|
|                | 2000-2004     |               | 2005-2010     |               | 2011-2014     |               | 2015-2017     |                                                                   |
|                | All<br>N=3348 | EMLs<br>N=540 | All<br>N=3240 | EMLs<br>N=297 | All<br>N=4266 | EMLs<br>N=351 | All<br>N=2430 | *left out due to<br>low N (=only 1<br>EML in this time<br>period) |
| Austria        | 23.07         | 25.30         | 21.02         | 18.16         | 13.06         | 6.63          | 8.34          |                                                                   |
| Belgium        | 34.60         | 32.54         | 25.00         | 24.65         | 24.24         | 13.21         | 18.33         |                                                                   |
| Bosnia         | 99.53         | 102.88        | 63.07         | 73.66         | 47.24         | 42.91         | 28.44         |                                                                   |
| Bulgaria       | 54.76         | 50.14         | 37.62         | 45.57         | 34.39         | 24.84         | 26.36         |                                                                   |
| Croatia        | 61.34         | 53.76         | 47.69         | 52.45         | 35.65         | 29.08         | 21.22         |                                                                   |
| Czech Republic | 40.10         | 36.47         | 27.78         | 30.34         | 24.70         | 12.47         | 16.99         |                                                                   |
| Finland        | 22.86         | 19.84         | 18.49         | 19.30         | 15.65         | 9.53          | 11.61         |                                                                   |
| France         | 33.00         | 34.09         | 25.45         | 23.52         | 24.33         | 20.36         | 19.58         |                                                                   |
| Germany        | 19.44         | 20.11         | 14.40         | 18.56         | 10.93         | 5.92          | 7.49          |                                                                   |
| Hungary        | 39.62         | 30.87         | 27.14         | 27.41         | 26.68         | 11.97         | 20.38         |                                                                   |
| Ireland        | 19.63         | 23.12         | 23.74         | 19.27         | 18.81         | 10.89         | 18.04         |                                                                   |
| Italy          | 30.78         | 30.62         | 25.58         | 24.25         | 20.95         | 12.03         | 14.60         |                                                                   |
| Latvia         | 45.75         | 52.22         | 36.90         | 43.68         | 35.55         | 22.43         | 14.15         |                                                                   |
| Lithuania      | 48.36         | 50.47         | 46.05         | 72.26         | 33.53         | 26.52         | 21.23         |                                                                   |
| Netherlands    | 11.10         | 16.56         | 7.56          | 5.16          | 5.78          | 1.62          | 5.38          |                                                                   |
| Norway         | 26.69         | 21.89         | 22.05         | 19.30         | 15.11         | 11.71         | 10.41         |                                                                   |
| Poland         | 40.80         | 36.19         | 24.73         | 14.98         | 21.39         | 9.10          | 14.70         |                                                                   |
| Portugal       | 33.36         | 33.27         | 24.78         | 21.36         | 18.16         | 6.23          | 12.56         |                                                                   |
| Romania        | 51.90         | 47.16         | 41.16         | 41.92         | 31.42         | 20.95         | 21.89         |                                                                   |
| Serbia         | 71.90         | 62.78         | 59.47         | 73.57         | 46.21         | 41.68         | 32.57         |                                                                   |
| Slovakia       | 43.41         | 37.03         | 27.90         | 27.35         | 24.06         | 16.66         | 20.62         |                                                                   |
| Slovenia       | 44.89         | 45.02         | 31.72         | 29.73         | 24.28         | 15.73         | 16.56         |                                                                   |
| Spain          | 26.44         | 25.11         | 23.41         | 21.66         | 22.56         | 15.30         | 17.90         |                                                                   |
| Sweden         | 14.73         | 16.78         | 12.88         | 21.56         | 6.82          | 4.17          | 4.55          |                                                                   |
| Switzerland    | 26.13         | 18.84         | 29.78         | 20.78         | 19.88         | 7.49          | 15.62         |                                                                   |
| Turkey         | 46.76         | 40.63         | 50.88         | 50.89         | 40.63         | 22.84         | 29.02         |                                                                   |
| UK             | 20.42         | 22.63         | 17.00         | 16.77         | 11.23         | 4.30          | 7.52          |                                                                   |
